# Supplementary material for: A high performance photothermal film with spherical shell-type metallic nanocomposites for solar thermoelectric conversion
Source: Royal Society of Chemistry journal article supplement (doi:10.1039/c5nr00943j), 2015-01-01
Supplement: c5nr00943j1.pdf [file c5nr00943j1.pdf]

## Electronic Supplementary Information

**A high performance photothermal film  
with spherical shell-type metallic nanocomposites  
for solar thermoelectric conversion**

Atsuko Kosuga,<sup>\*</sup> Yasuyuki Yamamoto, Moe Miyai, Mie Matsuzawa,  
Yushi Nishimura, Shimpei Hidaka, Kohei Yamamoto, Shin Tanaka,  
Yojiro Yamamoto, Shiho Tokonami, and Takuya Iida<sup>\*</sup>

Table S1. Resistance ( $R$ ), open circuit voltage ( $V_o$ ), maximum output power ( $P_{\max}$ ), and maximum power density ( $P'_{\max}$ ) of PTF-TE using AuNP-FB, AgNP-FB, single AuNP films, a reference film with no metallic NPs and with black body tape.

|                                    | AuNP-FB | AgNP-FB | Single AuNP | Reference (no metallic NPs) | Reference (black body) |
|------------------------------------|---------|---------|-------------|-----------------------------|------------------------|
| $R$ ( $\Omega$ )                   | 213     | 215     | 215         | 214                         | 215                    |
| $V_o$ (mV)                         | 274     | 231     | 183         | 61                          | 264                    |
| $P_{\max}$ (mW)                    | 0.088   | 0.062   | 0.039       | 0.004                       | 0.081                  |
| $P'_{\max}$ (mW cm <sup>-2</sup> ) | 1.04    | 0.73    | 0.46        | 0.05                        | 0.96                   |
